# Supplementary material
Source: MDPI journal article supplement (https://www.mdpi.com/2036-7481/12/1/9)
Supplement: s1 [file s1]

## Sheet: Table S1
Supplementary Table S1: Antimicrobial susceptibility profiles of Escherichia coli isolates collected from different wild animals.
Strain	AMP	AMC	TIC	PIP	PTZ	CXN	CXM	FOX	FIX	COX	CZD	ATM	FEP	ETP	IMP	MEC	TMN	AMK	GMN	NTM	NAL	NXN	OFX	CIP	CHL	TMP	SXT	TEM	FOS
1-102	R	S	R	R	S	R	R	S	R	R	S	S	R	S	S	S	S	S	S	S	R	R	R	R	S	R	R	S	S
13-103	R	S	R	R	S	R	R	S	R	R	S	S	R	S	S	S	S	S	S	S	R	R	R	R	S	R	R	S	S
2-101	R	S	R	R	S	R	R	S	R	R	S	S	R	S	S	S	S	S	S	S	R	R	R	R	S	R	R	R	S
21-101	R	S	R	R	S	R	R	S	R	R	S	S	R	S	S	S	S	S	S	S	R	R	R	R	S	R	R	R	S
BU10A	R	S	R	R	S	R	R	S	R	R	S	S	R	S	S	S	S	S	S	S	S	S	S	S	S	R	R	S	S
BU10B	R	S	R	R	S	R	R	S	R	R	S	S	S	S	S	S	S	S	S	S	S	S	S	S	S	R	R	R	S
BU22A	R	S	R	R	S	R	R	S	R	R	S	S	R	S	S	S	S	S	S	S	R	R	R	R	S	R	R	S	S
BU41A	R	S	R	R	S	R	R	S	R	R	S	S	R	S	S	S	S	S	S	S	S	S	S	S	S	R	R	S	S
GV23	R	R	R	R	R	R	R	S	R	R	S	S	S	S	S	S	S	S	S	S	S	S	S	S	R	S	S	R	S
J31	R	S	R	R	S	R	R	S	R	R	S	S	R	S	S	S	S	S	S	S	S	S	S	S	S	R	R	S	S
J64	R	S	R	R	S	R	R	S	R	R	S	S	R	S	S	R	S	S	S	S	R	R	R	R	S	R	R	R	S
J69	R	S	R	R	S	R	R	S	R	R	S	S	R	S	S	S	S	S	S	S	R	R	R	R	S	R	R	S	S
L16	R	S	R	R	S	R	R	S	R	R	S	S	S	S	S	S	R	S	R	R	S	S	S	S	S	S	R	S	S
L98	R	S	R	R	S	R	R	S	R	S	R	R	S	S	S	S	S	S	S	S	R	S	S	S	R	R	R	S	S
TB63	R	S	R	R	S	R	R	S	R	R	S	S	R	S	S	S	S	S	S	S	R	S	R	S	S	R	R	S	S
W151	R	S	R	R	S	R	R	S	R	R	R	R	R	S	S	S	S	S	S	S	S	S	S	S	S	S	S	R	S
W4	R	S	R	R	S	R	R	S	R	R	S	S	R	S	S	S	S	S	S	S	R	S	R	S	S	S	S	S	S
AMP- Ampicillin; AMC- Amoxicillin/clavulanic acid; TIC- Ticarcillin; PIL- Piperacillin; PTZ- Piperacillin/tazobactam; CXN- Cephalexin; CXM- Cefuroxime; FIX- Cefixime; FOX-Cefoxitin; COX- Cefotaxime; CZD- Ceftazidime; ATM- Aztreonam; FEP- Cefepime; ETP-Ertapenem; IMP-Imipenem; MEC- Mecillinam; TMN- Tobramycin; AMK- Amikacin; GMN- Gentamicin; NTM- Netilmicin; NAL- Nalidixic acid; NXN- Norfloxacin; …

## Sheet: Table S2
Supplementary Table S2: Plasmid analysis of Escherichia coli isolates based on experimental and whole geneome sequencing results.
Strain	Plasmid analysis experiment		plasmid finder and pMLST results
	Plamid content with size estimation from electrophoretic migration	Replicon sequences and ESBL genes colocalized in plasmids by southern blot	IncF	IncI1	IncX1	IncB/O/K/Z	IncN	IncY	p0111 (AP010962)
1-102	2 plamids (~150 kb and ~110 kb)	blaCTX-M-1 in 110-kb plasmid IncI1	F4:A-:B2	IncI1-ST3
13-103BC	3 plasmids (~150 kb, ~110 kb and ~50 kb)	blaCTX-M-1 in 110-kb plasmid IncI1	F-:A-:B1	IncI1-ST3	IncX1
2-101BC	2 plasmids (~150 kb and ~110 kb)	blaCTX-M-1 in 110-kb plasmid IncI1	F4:A-:B2	IncI1-ST3
21-101	2 plasmids (~150 kb and ~110 kb)	blaCTX-M-1 in 110-kb plasmid IncI1	F4:A-:B2	IncI1-ST3
BU10A	4 plasmids (~150 kb, ~125 kb, ~110 kb and ~50 kb)	blaCTX-M-1 in 110-kb plasmid IncI1	F24:A-:B2	IncI1-ST3	IncX1			IncY
BU10B	4 plasmids (~150 kb, ~125 kb, ~110 kb and ~50 kb)	blaCTX-M-1 in 110-kb plasmid IncI1	F24:A-:B2	IncI1-ST3	IncX1			IncY
BU22A	3 plasmids (~150 kb, ~110 kb and ~50 kb)	blaCTX-M-1 in 110-kb plasmid IncI1	F-:A-:B1	IncI1-ST3	IncX1
BU41ABC	4 plasmids (~150 kb, ~125 kb, ~110 kb and ~50 kb)	blaCTX-M-1 in 110-kb plasmid IncI1	F24:A-:B2	IncI1-ST3	IncX1			IncY
GV23	1 plasmid (~50 kb)	blaCTX-M-1 in 50-kb plasmid IncN					IncN-ST1
J31	4 plasmids (~150 kb, ~125 kb, ~110 kb and ~50 kb)	blaCTX-M-1 in 110-kb plasmid IncI1	F24:A-:B1	IncI1-ST3	IncX1			IncY
J64	2 plamids (~130 kb and ~110 kb)	blaCTX-M-1 in 110-kb plasmid IncI1	F4:A-:B2	IncI1-ST3
J69	4 plasmids (~150 kb, ~110 kb, ~90 kb and ~50 kb)	blaCTX-M-1 in 110-kb plasmid IncI1	F18:A-:B1:C4	IncI1-ST3		IncB/O/K/Z			p0111
L16	3 plasmids (~150 kb, ~110 kb and ~90 kb)	blaCTX-M-14 in 90-kb plasmid IncK	F-:A-:B1	IncI1-NT		IncB/O/K/Z
L98	2 plamids (~150 kb and ~110 kb)	blaSHV-12 in 110-kb plasmid IncI1	F2:A-:B1	IncI1-ST3
TB63	3 plasmids (~150 kb, ~110 kb and ~50 kb)	blaCTX-M-1 in 110-kb plasmid IncI1	F18:A-:B1:C4	IncI1-ST3	IncX1
W151	1 plasmid (~42 kb)	blaCTX-M-32 in 50-kb plasmid IncN					IncN-ST1
W4	3 plasmids (~120 kb, ~110 kb and ~90 kb)	blaCTX-M-1 in 110-kb plasmid IncI1	F55:A-:B27	IncI1-ST3					p0111
